# Supplementary material for: Adjusting the photovoltaic performance of big fused ring-based small molecules by tailoring with different modifications
Source: Royal Society of Chemistry journal article supplement (doi:10.1039/d1ra08239f), 2021-01-01
Supplement: d1ra08239f1.pdf [file d1ra08239f1.pdf]

## Supporting Information

### Adjusted photovoltaic performance of big fused ring-based small molecules by tailoring with different modifications

Min Li <sup>ab\*</sup>, Manjun Xiao <sup>c</sup>, Zuojia Li <sup>a\*</sup>

*<sup>a</sup>Jiangxi Province Key Laboratory of Polymer Micro/Nano Manufacturing and Devices, School of Chemistry, Biology and Materials Science, East China University of Technology, Nanchang 330013, P. R. China*

*<sup>b</sup>School of Materials Science and Engineering, Jiangsu Engineering Laboratory of Light-Electricity-Heat Energy-Converting Materials and Applications, Jiangsu Collaborative Innovation Center of Photovoltaic Science and Engineering, National Experimental Demonstration Center for Materials Science and Engineering, Changzhou University, Changzhou 213164, China.*

*<sup>c</sup>College of Chemistry, Key Lab of Environment-Friendly Chemistry and Application in the Ministry of Education, Xiangtan University, Xiangtan 411105, China.*

Email addresses:

(M.L) limin20a@126.com

(M. X) xmj0704@163.com

(Z. L) lzjshihaoren@126.com

# Contents

1. Characterization and Measurement.
2.  $^1\text{H}$  NMR,  $^{13}\text{C}$  NMR and MS Spectra.
3. The absorption molar coefficient in solution.
4. Fabrication and Characterization of Organic Solar Cells.
5. Photovoltaic properties of the AAN-DPP<sub>2</sub>/PC<sub>71</sub>BM-based OPV cells.
6. Photovoltaic properties of the AAN(T-DPP)<sub>2</sub>/PC<sub>71</sub>BM-based OPV cells.
7. Photovoltaic properties of the AANT(T-DPP)<sub>2</sub>/PC<sub>71</sub>BM-based OPV cells.
8. The PCE distribution of all devices at the optimized conditions.

## 1. Characterization and Measurement

Nuclear magnetic resonance (NMR) spectra were recorded on a Bruker AV-400 spectrometer using tetramethylsilane (TMS) as a reference in deuterated chloroform solution at 298 K. Mass spectrometric measurements were performed on Bruker Biflex III MALDI-TOF. Thermogravimetric analyses (TGA) were conducted under a dry nitrogen gas flow at a heating rate of 20 °C min<sup>-1</sup> on a Perkin-Elmer TGA 7. Differential scan calorimetry (DSC) measurements were carried out with a Netzsch DSC-204 under N<sub>2</sub> flow at heating and cooling rates of 10 °C min<sup>-1</sup>. UV-Vis absorption spectra were recorded on a HP-8453 UV visible system. Cyclic voltammograms (CV) were carried out on a CHI660A electrochemical work station with a three electrode electrochemical cell in a 0.1 M tetrabutylammonium hexafluorophosphate (TBAPF<sub>6</sub>) acetonitrile solution with a scan 100 mV s<sup>-1</sup> at room temperature (RT) under argon atmosphere. In this three-electrode cell, a platinum rod, platinum wire and Ag/AgCl electrode were used as a working electrode, counter electrode and reference electrode, respectively. The HOMO and LUMO distributions of SMs were calculated by the density functional theory (DFT) (B3LYP; 6-31G\*) method.

## 2. $^1\text{H}$ NMR and $^{13}\text{C}$ NMR Spectra

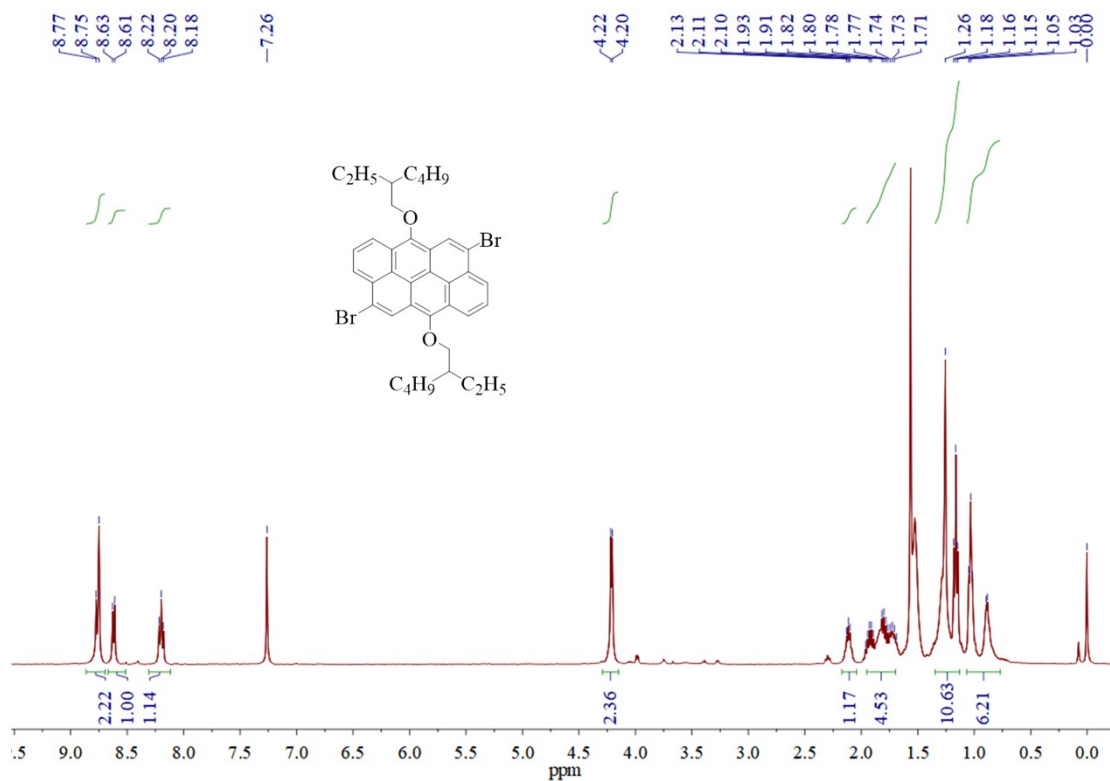

Fig.S1.  $^1\text{H}$  NMR spectrum of AAN.

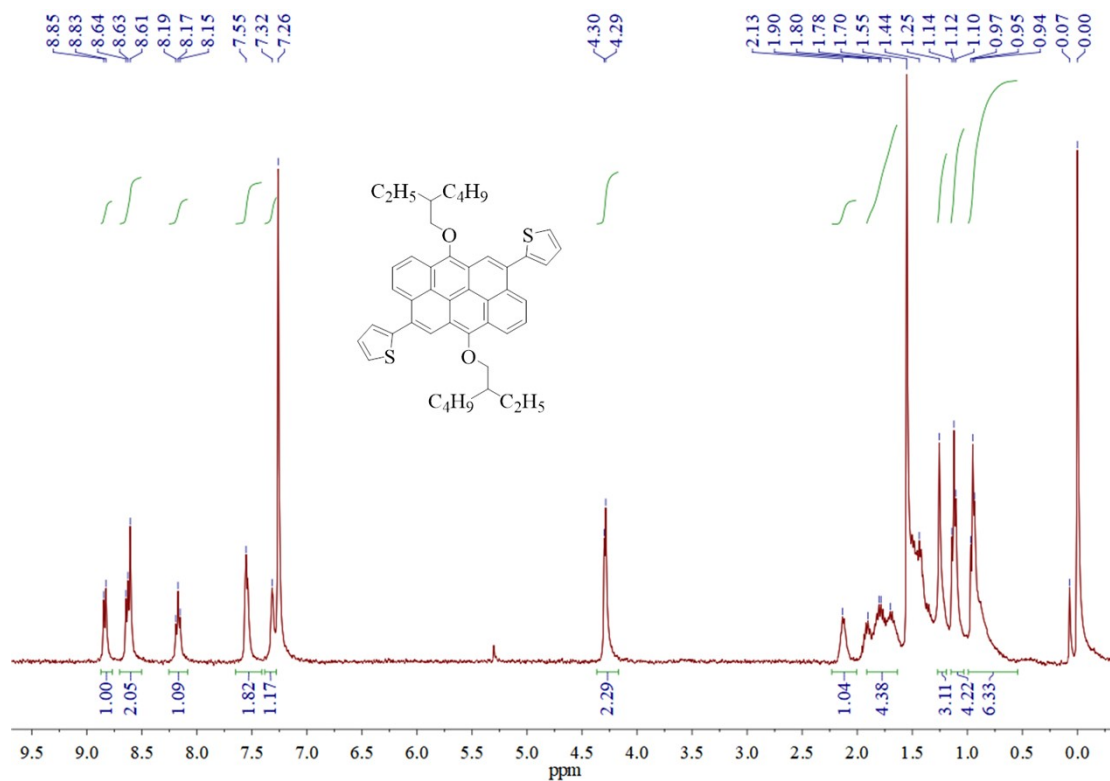

**Fig. S2.**  $^1\text{H}$  NMR spectrum of AAN-T.

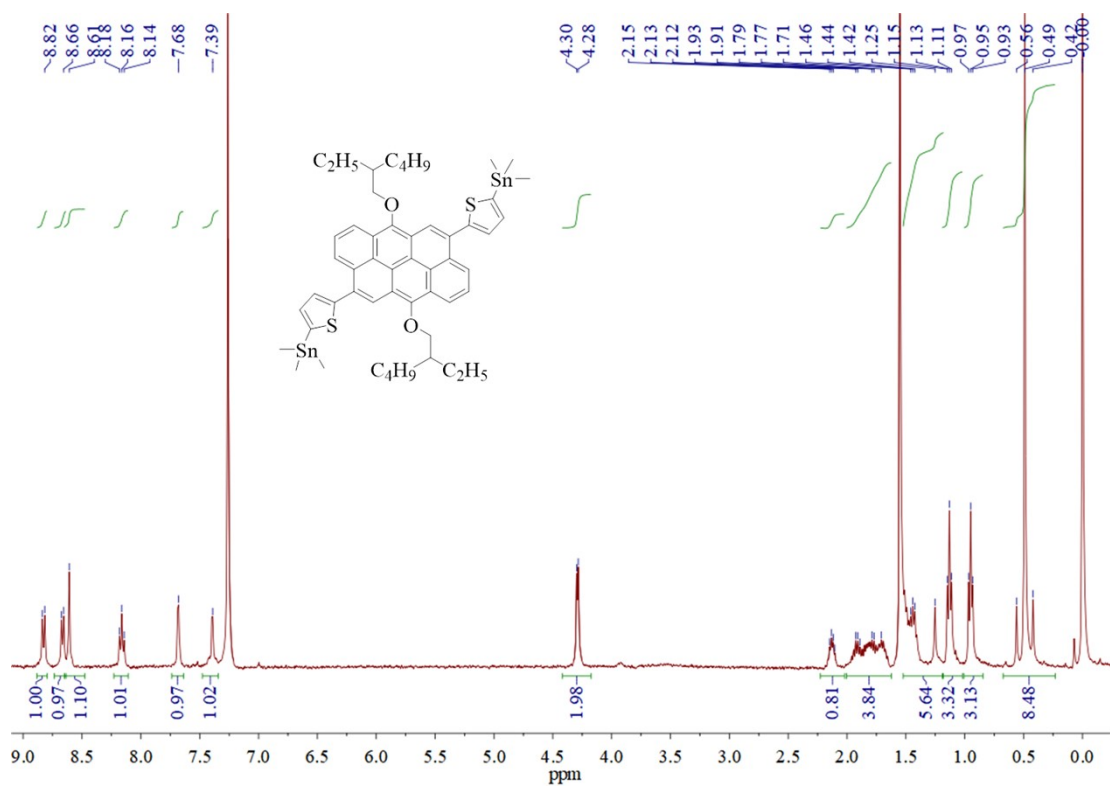

**Fig.S3.**  $^1\text{H}$  NMR spectrum of AAN-T-Sn.

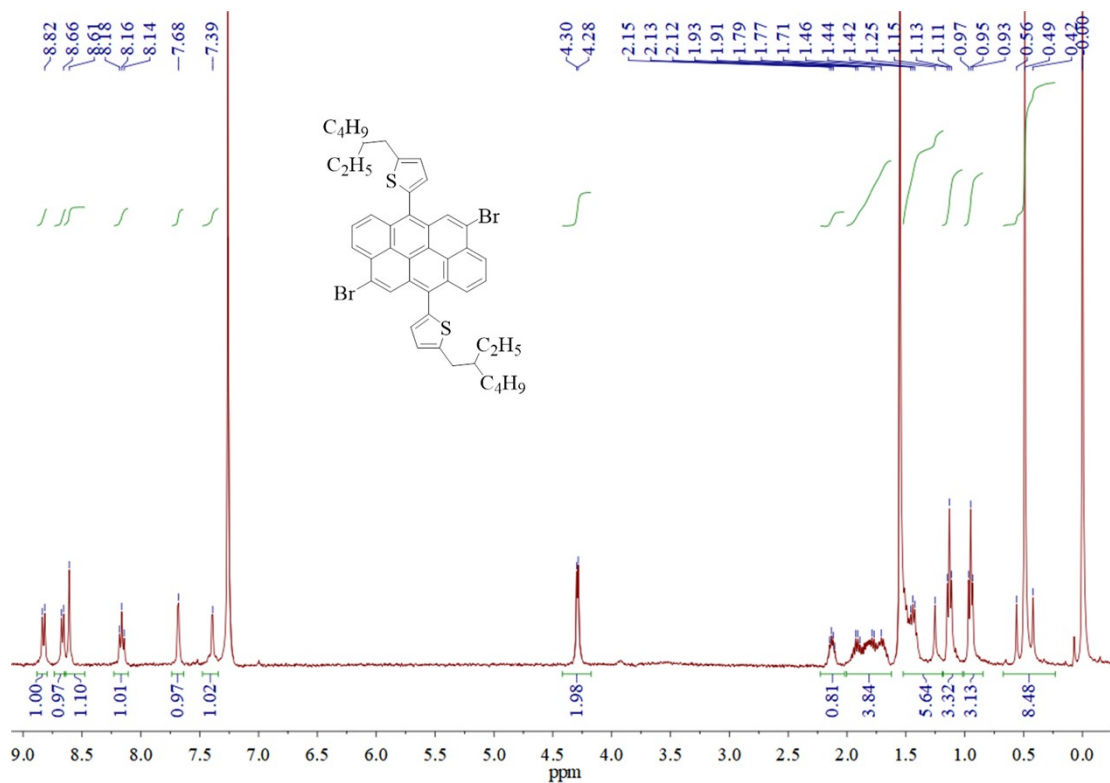

**Fig.S4.**  $^1\text{H}$  NMR spectrum of AANT.

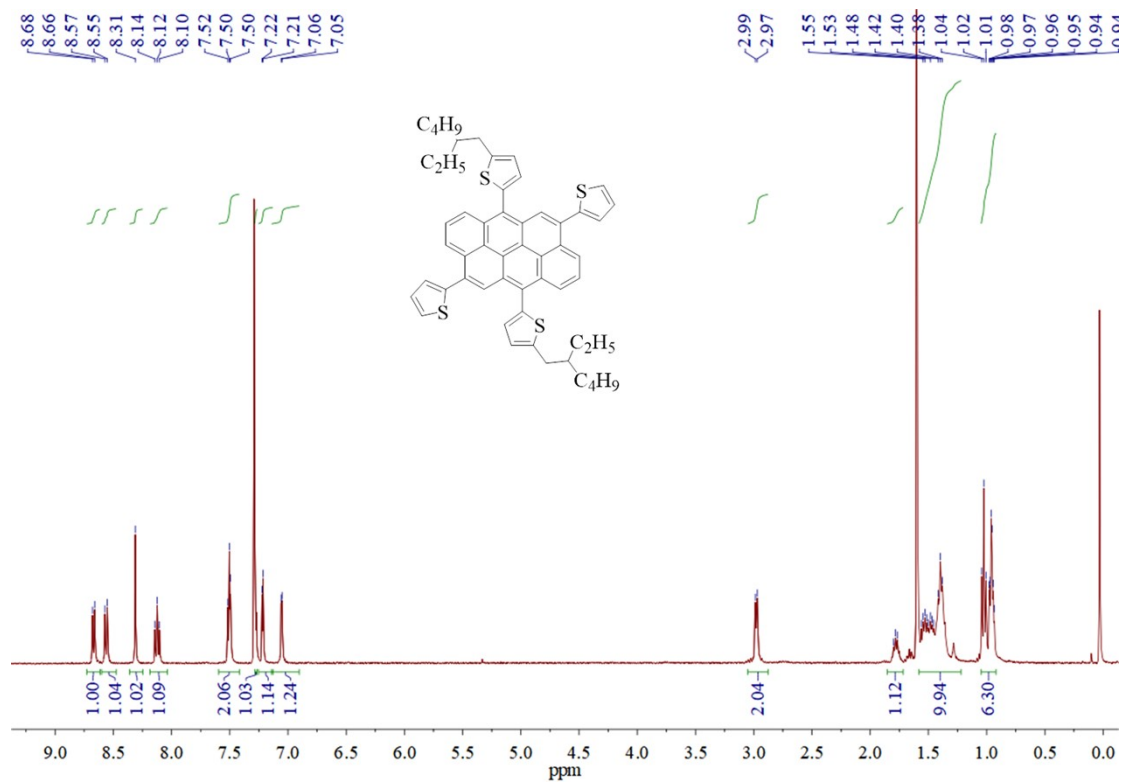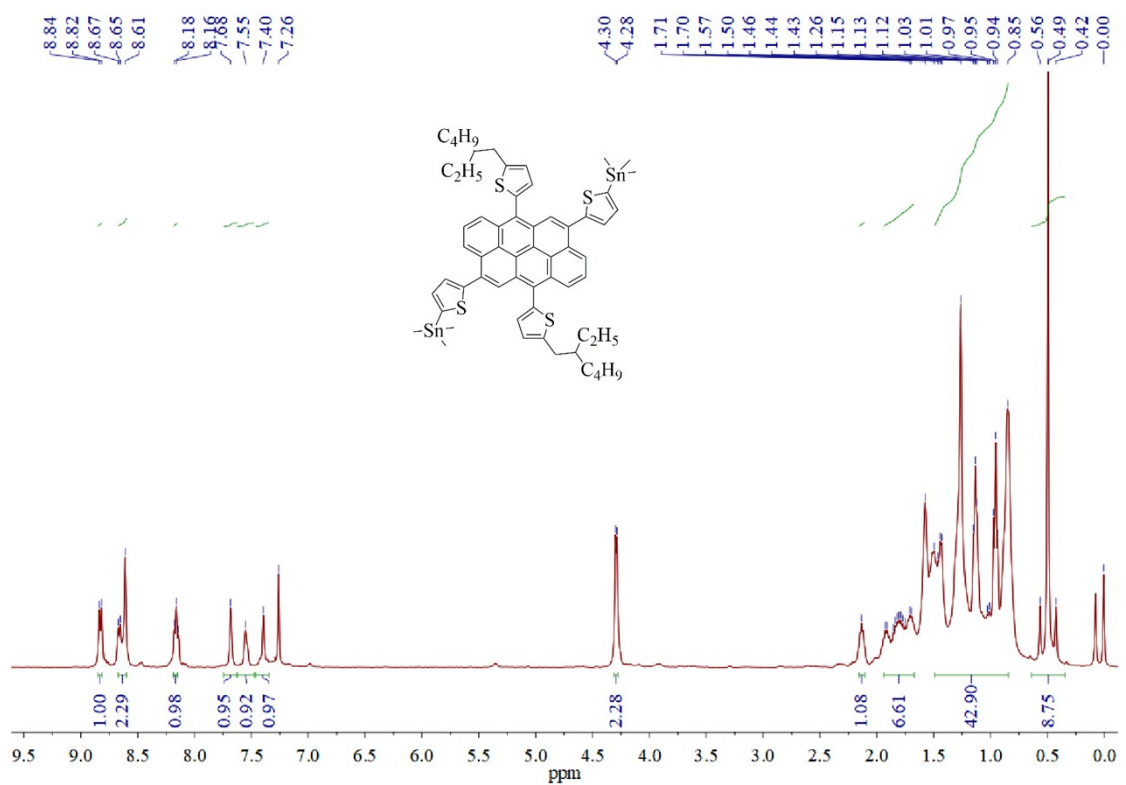

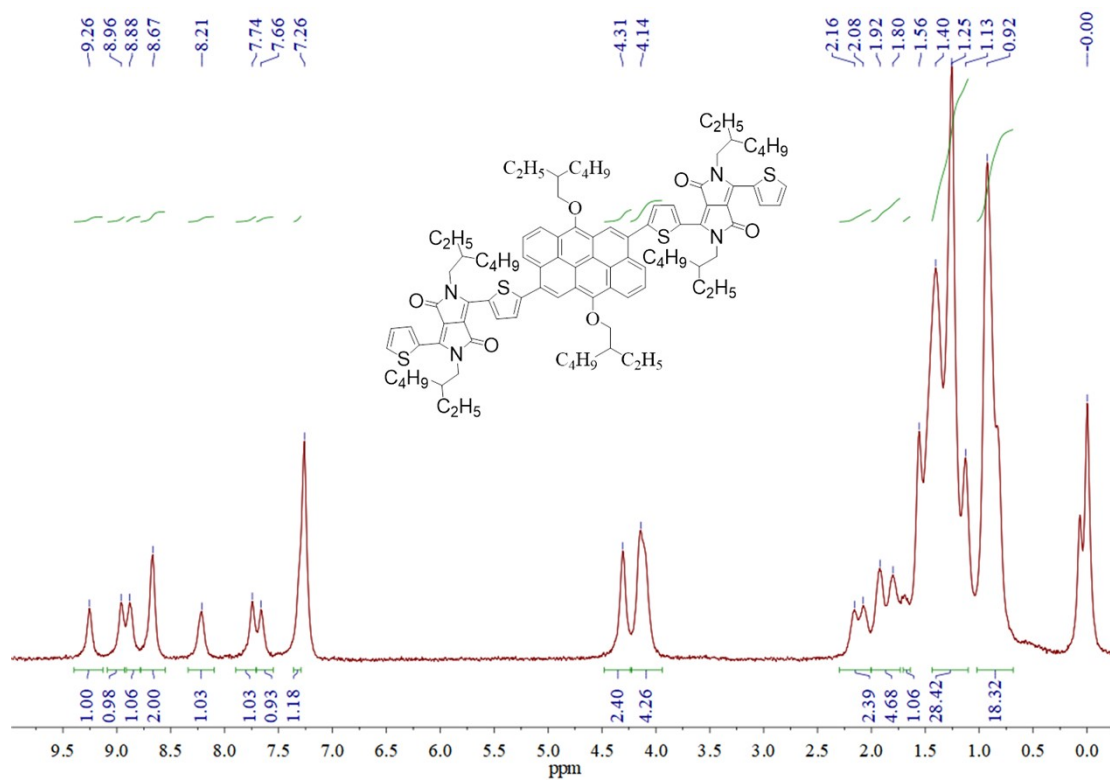

**Fig.S7.** <sup>1</sup>H NMR spectrum of AAN-DPP<sub>2</sub>.

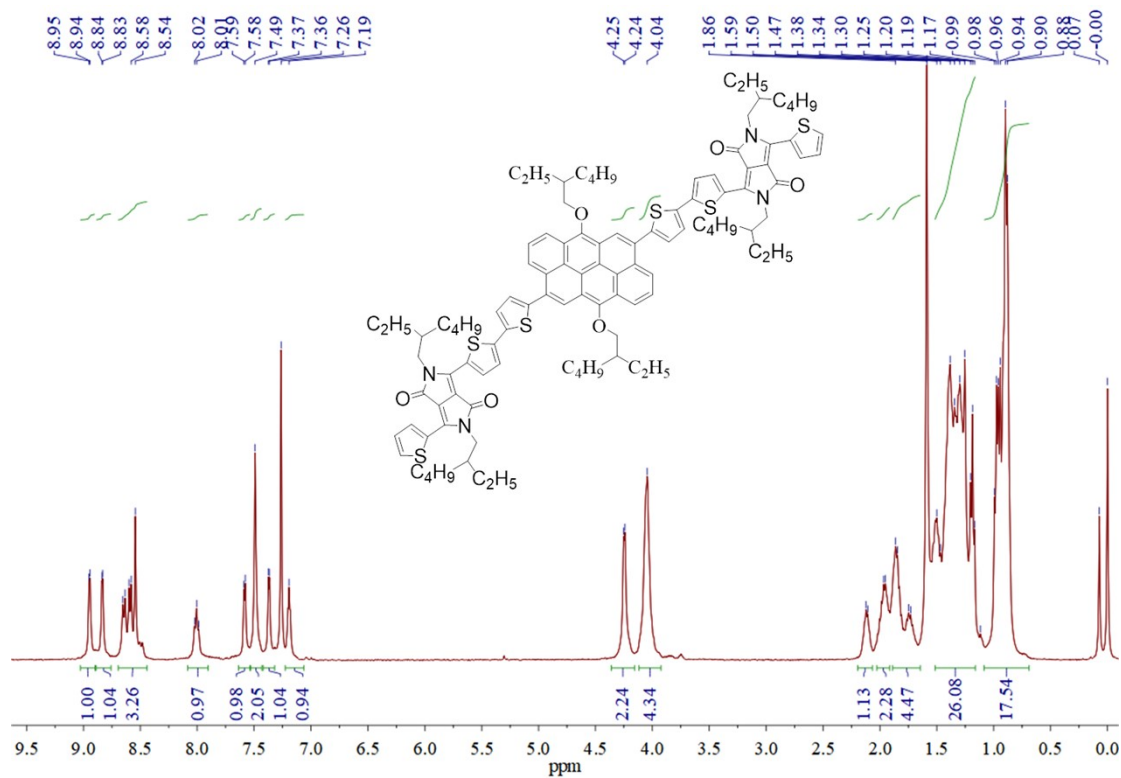

**Fig.S8.** <sup>1</sup>H NMR spectrum of AAN(T-DPP)<sub>2</sub>.

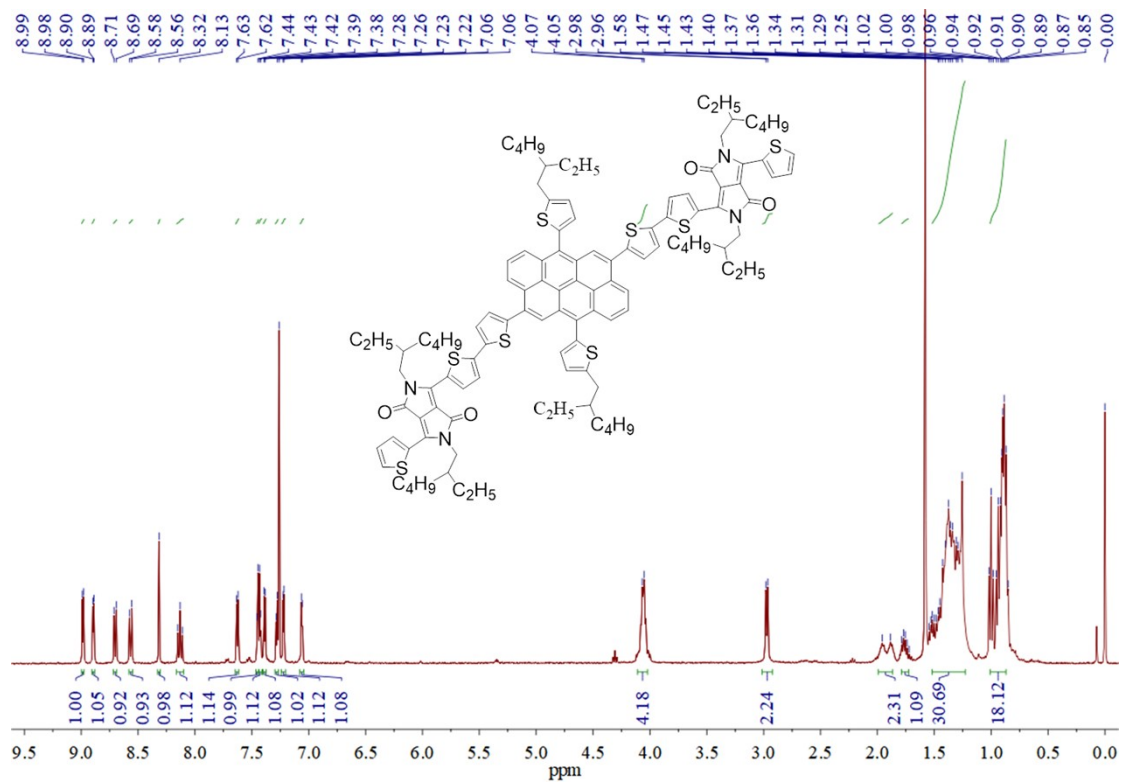

**Fig.S9.** <sup>1</sup>H NMR spectrum of AANT(T-DPP)<sub>2</sub>.

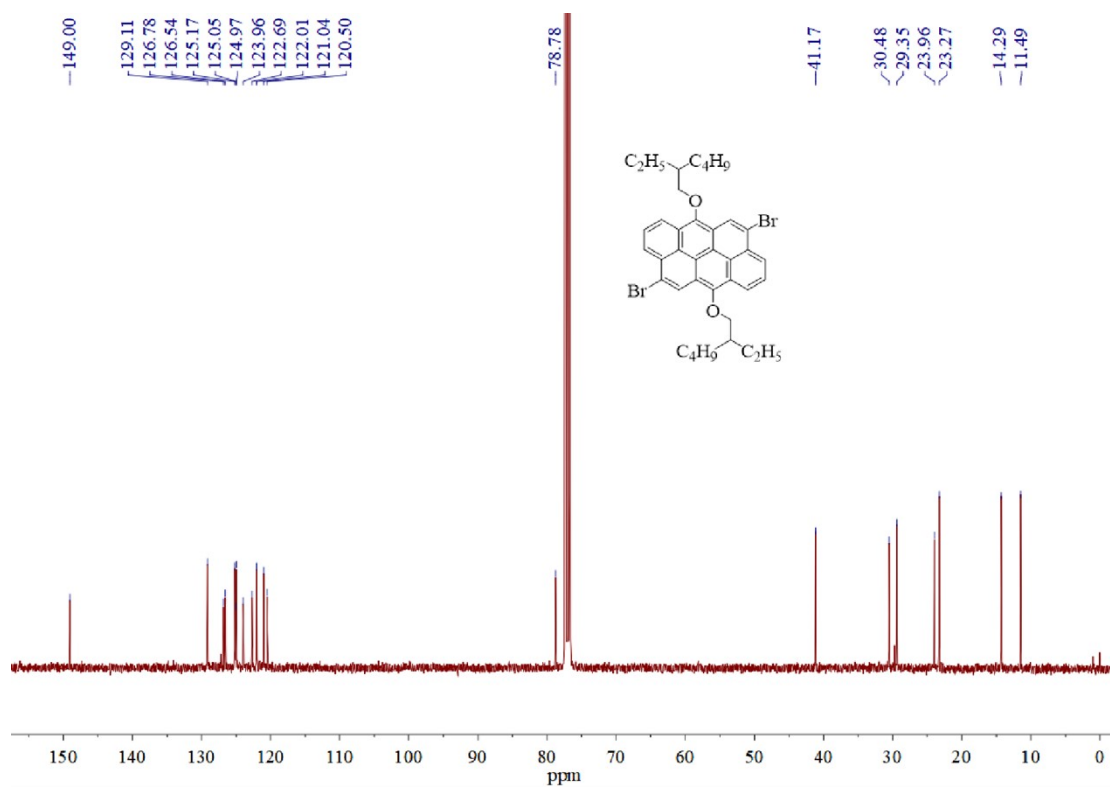

**Fig. S10.** <sup>13</sup>C-NMR spectrum of AAN.



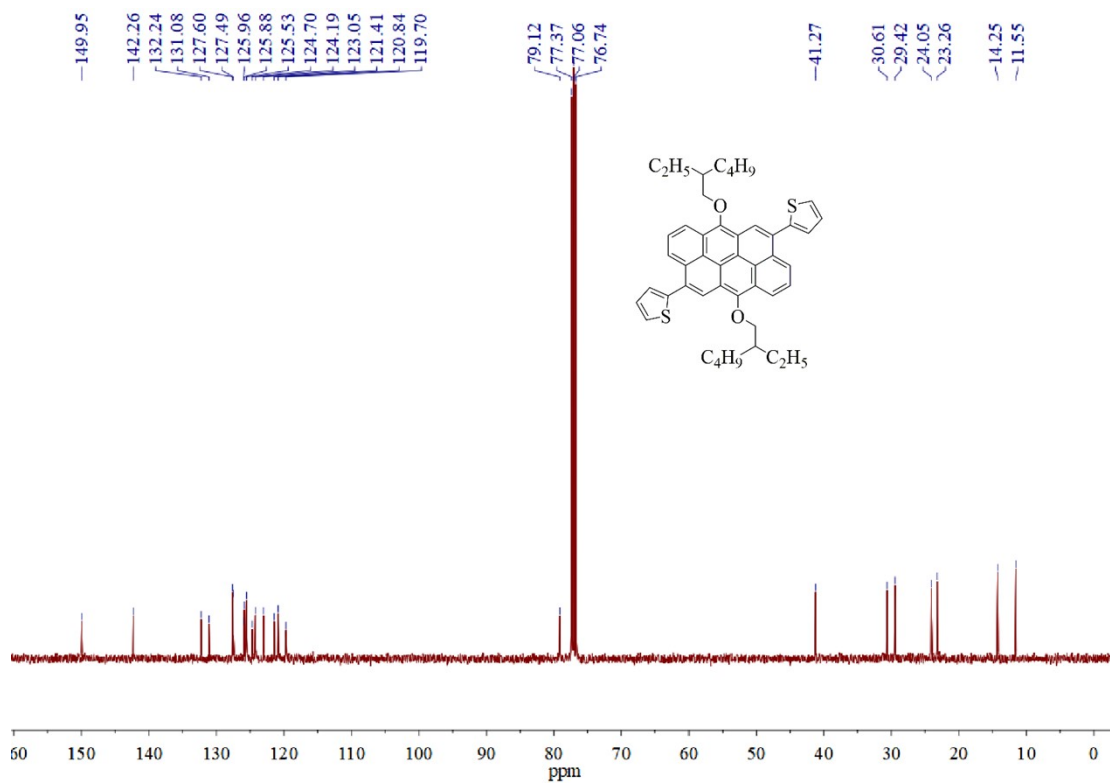

Fig. S11. <sup>1</sup>H-NMR spectrum of AAN-T.

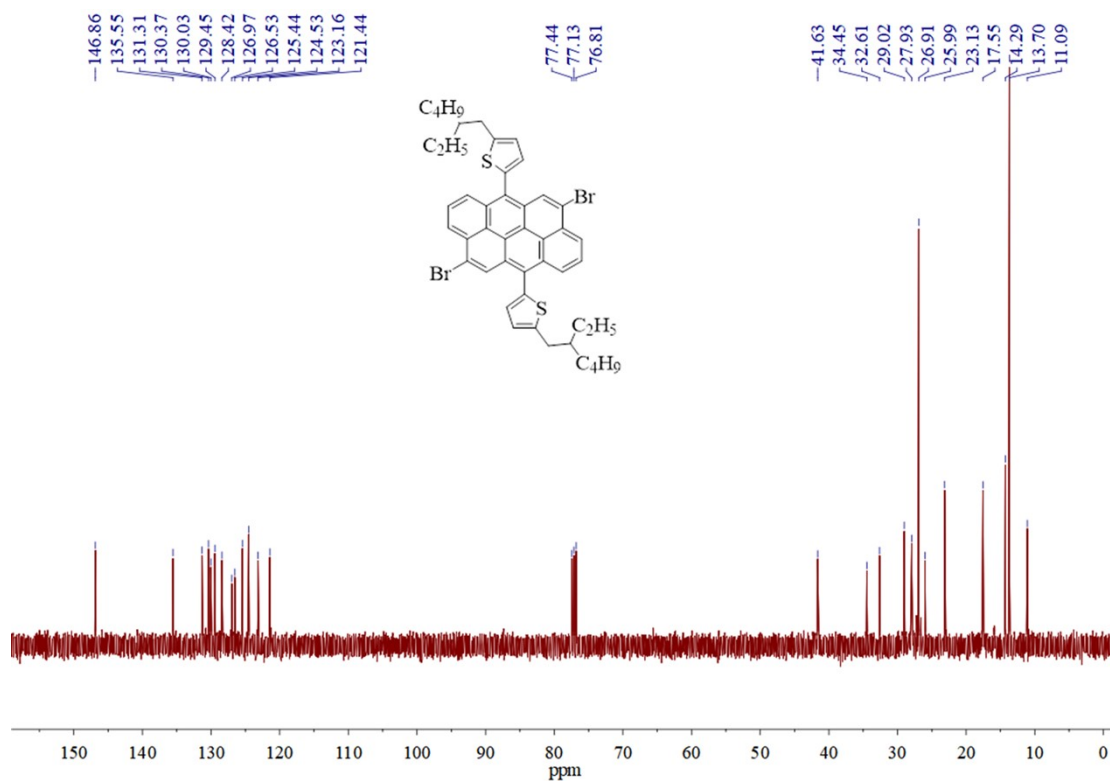

Fig. S12. <sup>1</sup>H-NMR spectrum of AANT.

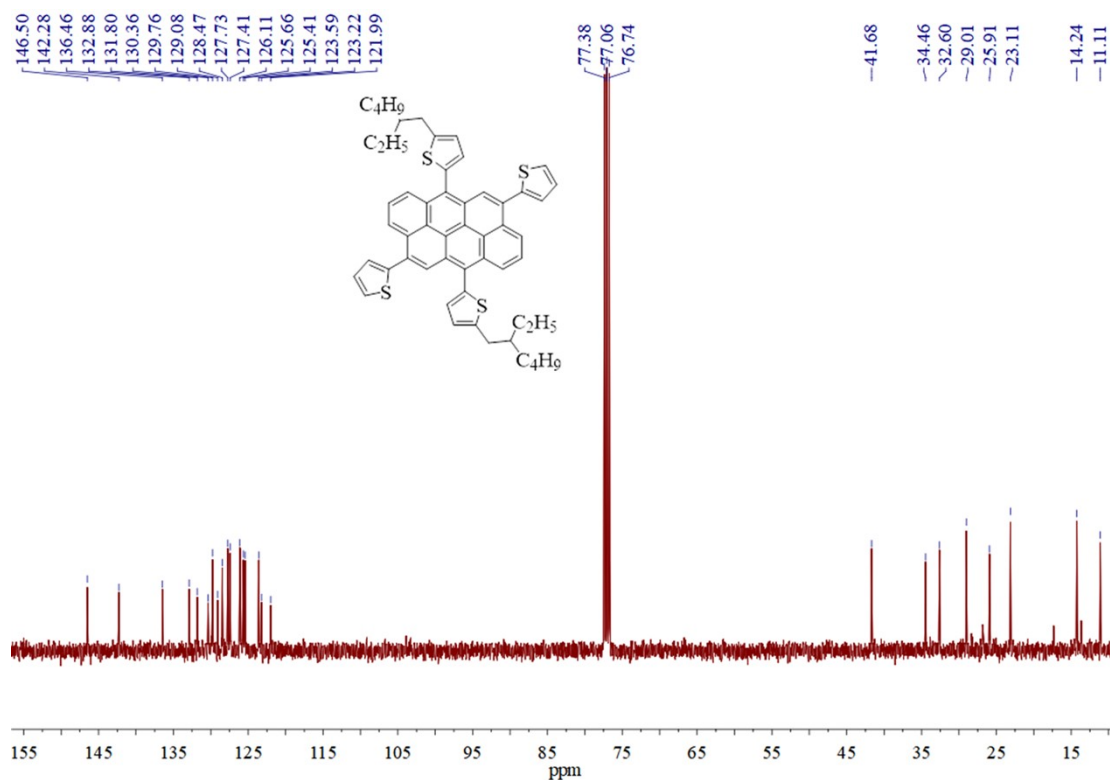

**Fig. S13.**  $^1H$ NMR spectrum of AANT-T.

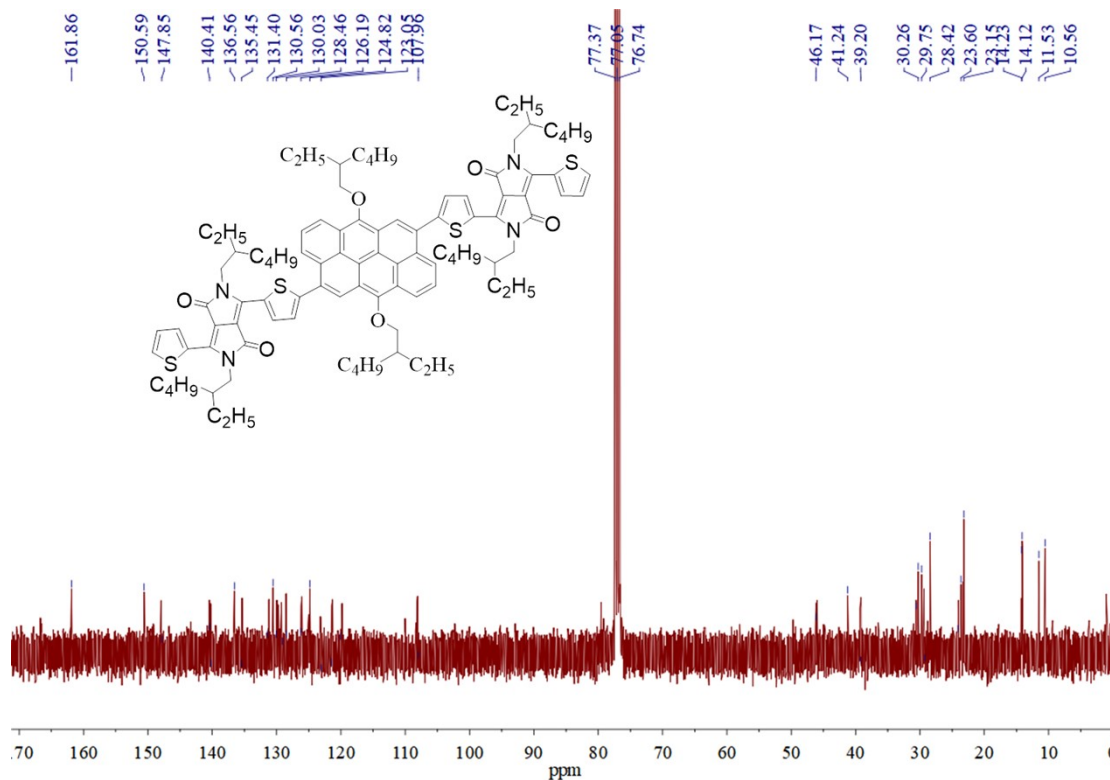

**Fig. S14.**  $^1H$ -NMR spectrum of AAN-DPP<sub>2</sub>.

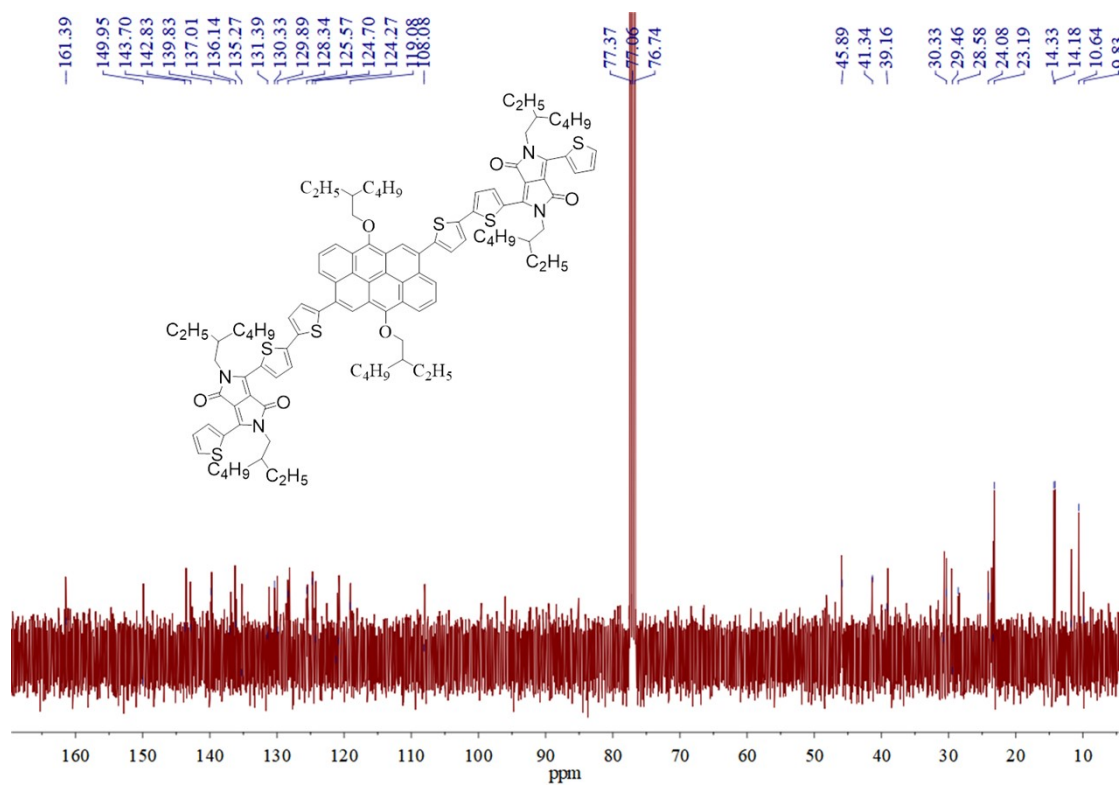

**Fig. S15.** <sup>1</sup>H-NMR spectrum of AAN(T-DPP)<sub>2</sub>.

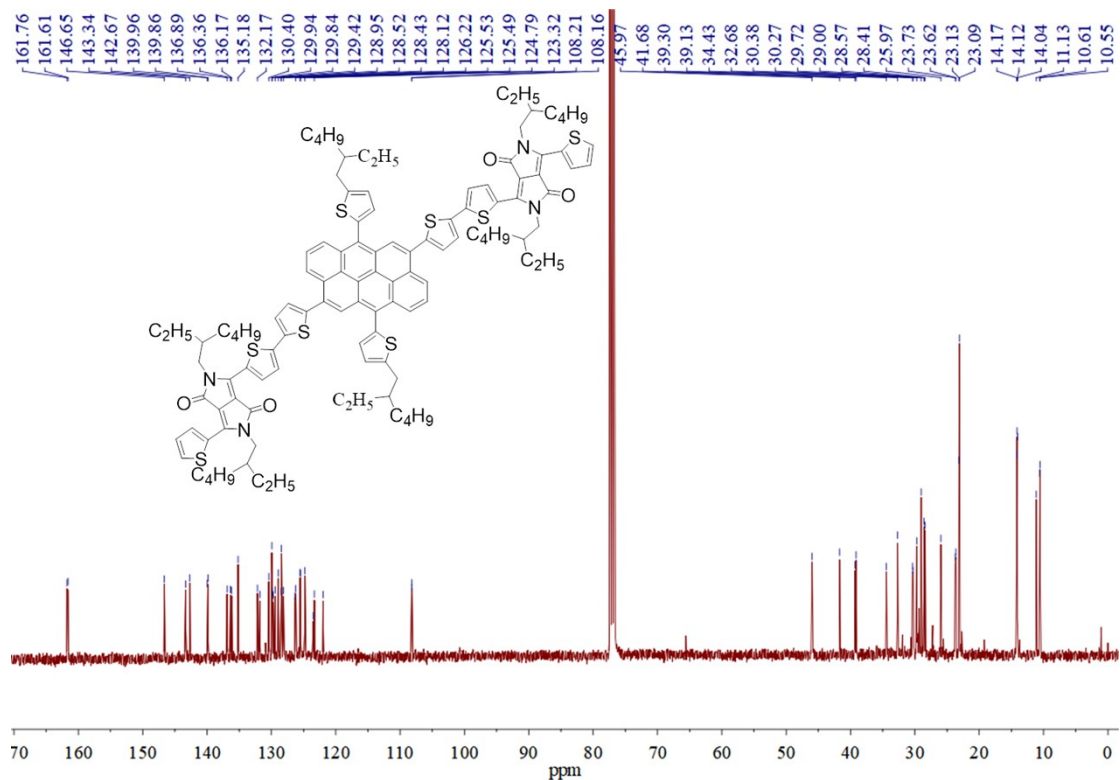

**Fig. S16.** <sup>1</sup>H-NMR spectrum of AANT(T-DPP)<sub>2</sub>.

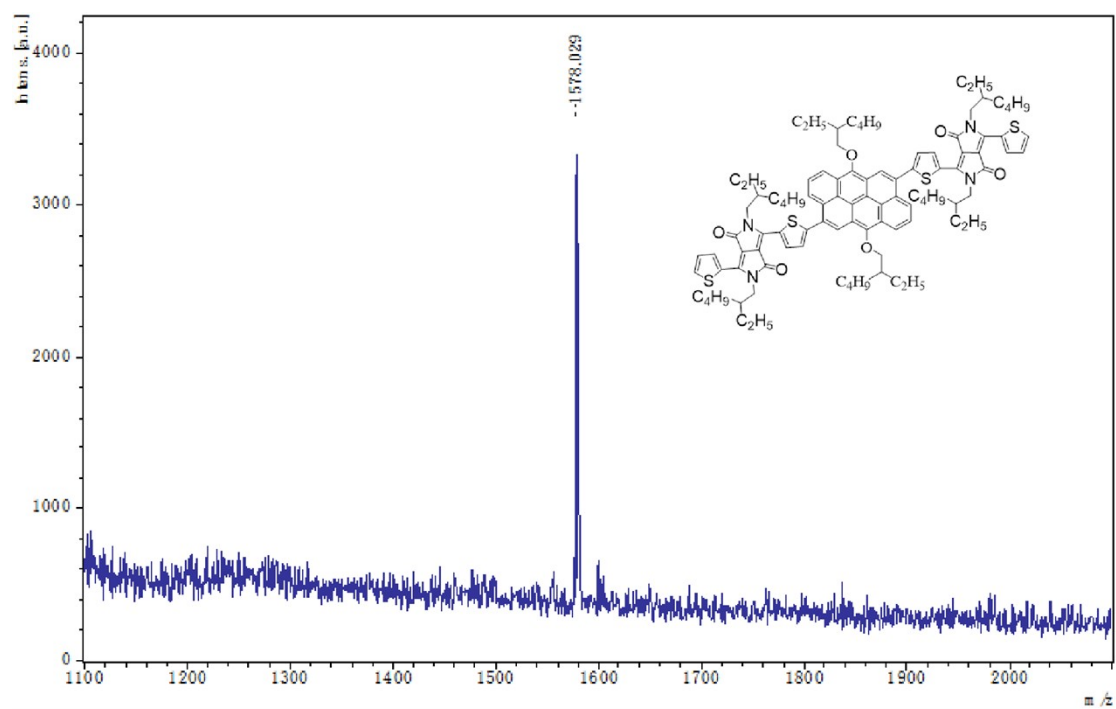

Fig. S17. MALDI-TOF MS Spectrum of AAN-DPP<sub>2</sub>.

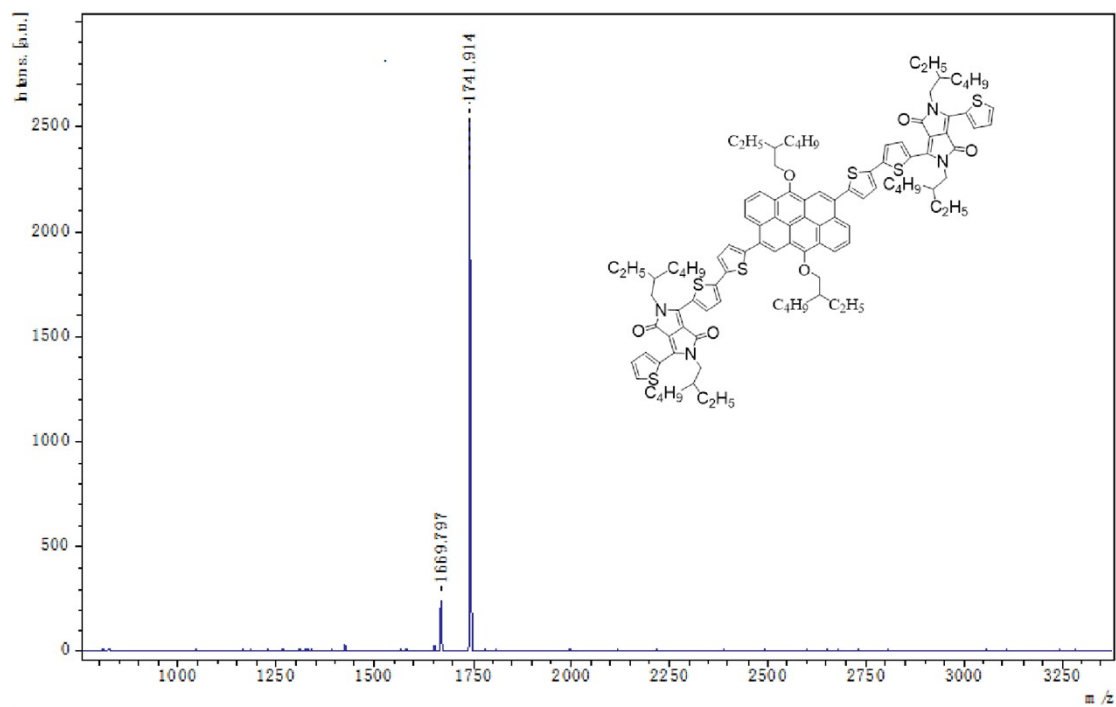

Fig. S18. MALDI-TOF MS Spectrum of AAN(T-DPP)<sub>2</sub>.

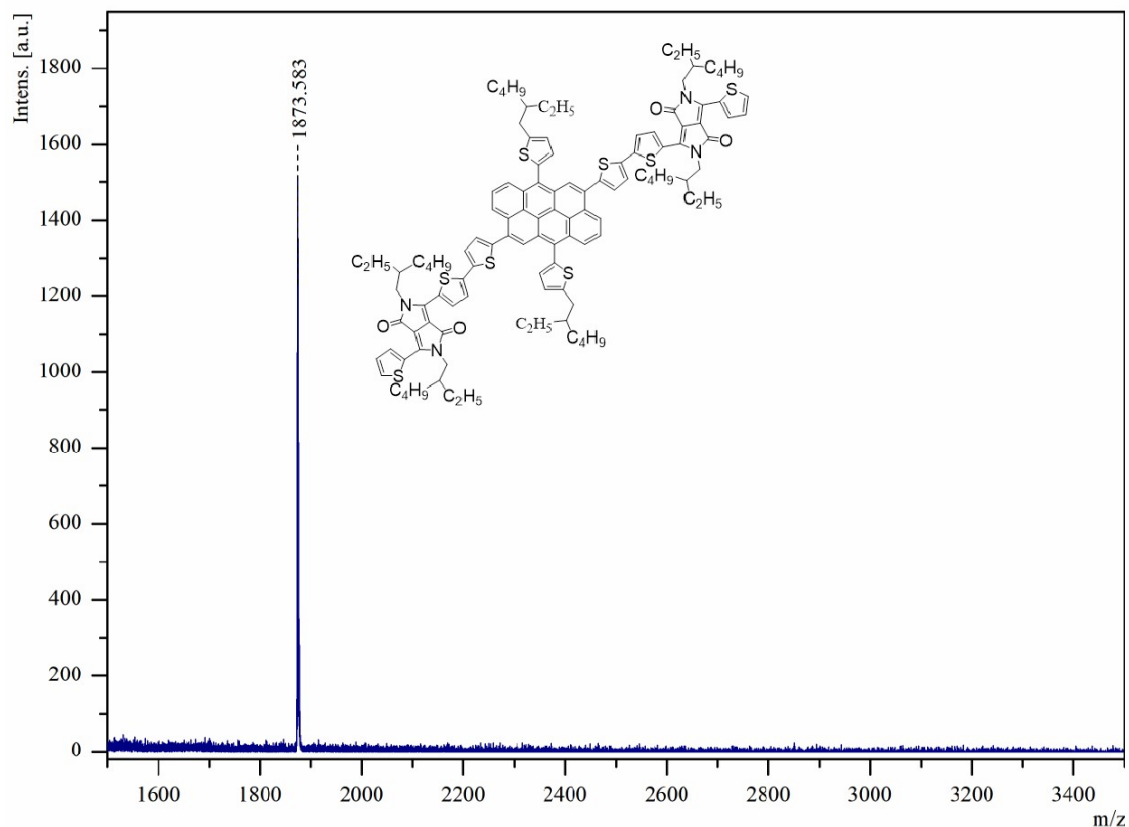

**Fig. S19.** MALDI-TOF MS Spectrum of AANT(T-DPP)<sub>2</sub>.

### 3.The absorption molar coefficient in solution.

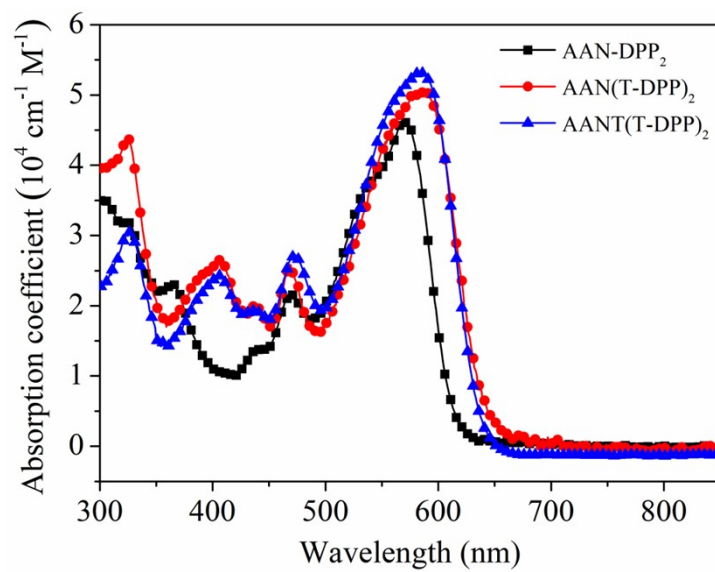

**Fig.S20.** Absorption spectra of SMs in dilute CHCl<sub>3</sub>, respectively.

#### **4. Fabrication and Characterization of Organic Solar Cells**

A sandwich structure of: ITO/PEDOT:PSS(5000 rpm, 140 °C 30min)/SM:PC<sub>71</sub>BM /Ca (10 nm)/Al (100 nm), was used in the solar cells. The photosensitive layer was subsequently prepared by spin-coating rate of 5000 rpm, with a solution of the SM/PC<sub>71</sub>BM (1:4, w/w) for AAN-DPP<sub>2</sub>, (1:3, w/w) for AAN(T-DPP)<sub>2</sub> and (1:4, w/w) for AANT(T-DPP)<sub>2</sub>, respectively. Being dissolved in chloroform (CF) without additive on the PEDOT:PSS layer with a typical concentration of 12 mg mL<sup>-1</sup> for AAN-DPP<sub>2</sub>, AAN(T-DPP)<sub>2</sub>, and 10 mg mL<sup>-1</sup> for AANT(T-DPP)<sub>2</sub>. Furthermore, followed by annealing at 70 °C for 3 minutes. Ca (10 nm) and Al (100 nm) were successively deposited on the photosensitive layer in vacuum and used as top electrodes. The current-voltage (*I-V*) characterization of the devices was carried out on a computer-controlled Keithley source measurement system. A solar simulator was used as the light source and the light intensity was monitored by a standard Si solar cell. The active area was 0.1 cm<sup>2</sup> for each cell. The thicknesses of the spun-cast films were recorded by a profilometer (Alpha-Step 200, Tencor Instruments). The external quantum efficiency (*EQE*) was measured with a Stanford Research Systems model SR830 DSP lock-in amplifier coupled with WDG3 monochromator and a 150 W xenon lamp.

#### **5. Photovoltaic properties of the AAN-DPP<sub>2</sub>/PC<sub>71</sub>BM-based OPV cells.**

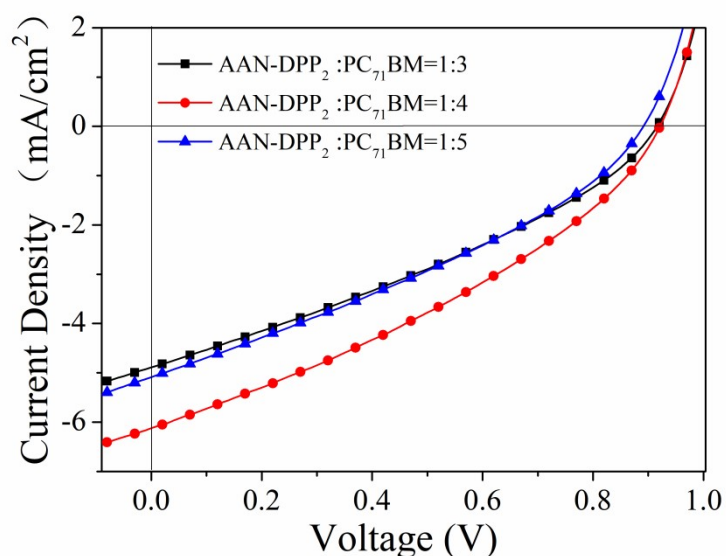

**Fig. S21.**  $J$ - $V$  curve of the AAN-DPP<sub>2</sub>/PC<sub>71</sub>BM-based OSCs under AM.1.5G illumination (100 mW/cm<sup>2</sup>) with SM/PC<sub>71</sub>BM weight ratios optimization.

**Table S1.** Photovoltaic parameters of the AAN-DPP<sub>2</sub>/PC<sub>71</sub>BM-based OSCs under AM.1.5G illumination (100 mW/cm<sup>2</sup>) with SM/PC<sub>71</sub>BM weight ratios optimization.

| D/A | $V_{oc}$ (V) | $J_{sc}$ (mA/cm <sup>2</sup> ) | FF(%) | PCE(%) |
|-----|--------------|--------------------------------|-------|--------|
| 1:3 | 0.91         | 4.89                           | 32.78 | 1.46   |
| 1:4 | 0.92         | 6.12                           | 34.25 | 1.92   |
| 1:5 | 0.89         | 5.09                           | 32.67 | 1.47   |

Device condition:

- (1) chloroform(CF);
- (2) concentration: 12 mg/mL of AAN-DPP<sub>2</sub> in CF;
- (3) Structure: ITO/PEDOT:PSS (5000 rpm, 140 °C, 30 min)/SM:PC<sub>71</sub>BM (5000 rpm)/Ca (10 nm)/Al (100 nm)
- (4) Spin-coating temperature: at room temperature.

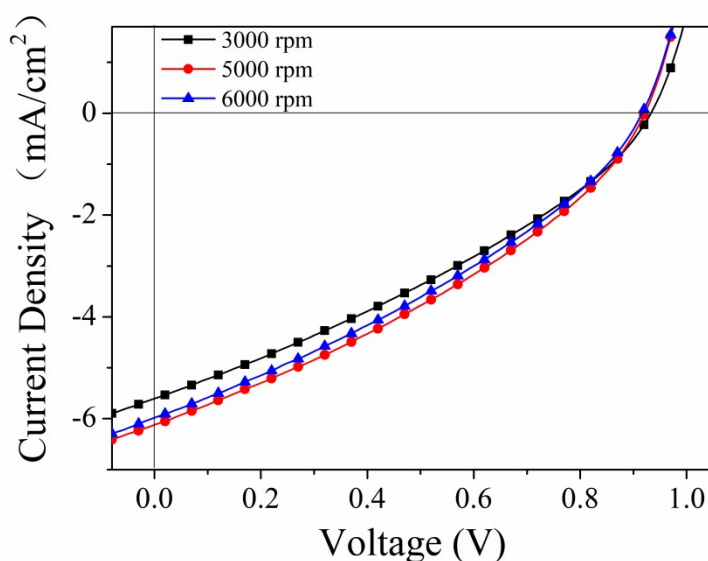

**Fig. S22.**  $J$ - $V$  curve of the AAN-DPP<sub>2</sub>/PC<sub>71</sub>BM-based OSCs under AM.1.5G illumination (100 mW/cm<sup>2</sup>) with SM/PC<sub>71</sub>BM spin speed optimization.

**Table. S2.** Photovoltaic parameters of the AAN-DPP<sub>2</sub>/PC<sub>71</sub>BM-based OSCs under AM.1.5G illumination (100 mW/cm<sup>2</sup>) with SM/PC<sub>71</sub>BM spin speed optimization.

| Spin speed | $V_{oc}$ (V) | $J_{sc}$ (mA/cm <sup>2</sup> ) | FF(%) | PCE(%) |
|------------|--------------|--------------------------------|-------|--------|
| 3000 rpm   | 0.93         | 5.60                           | 32.88 | 1.71   |
| 5000 rpm   | 0.92         | 6.12                           | 34.25 | 1.92   |
| 6000 rpm   | 0.91         | 5.98                           | 33.50 | 1.82   |

Device condition:

(1) chloroform(CF);

(2) concentration: 12 mg/mL of AAN-DPP<sub>2</sub> in CF;

(3) Structure: ITO/PEDOT:PSS (5000 rpm, 140 °C, 30 min)/SM:PC<sub>71</sub>BM= 1:4/Ca (10 nm)/Al (100 nm)

(4) Spin-coating temperature: at room temperature.



## 6. Photovoltaic properties of the AAN(T-DPP)<sub>2</sub>/PC<sub>71</sub>BM-based OPV cells.

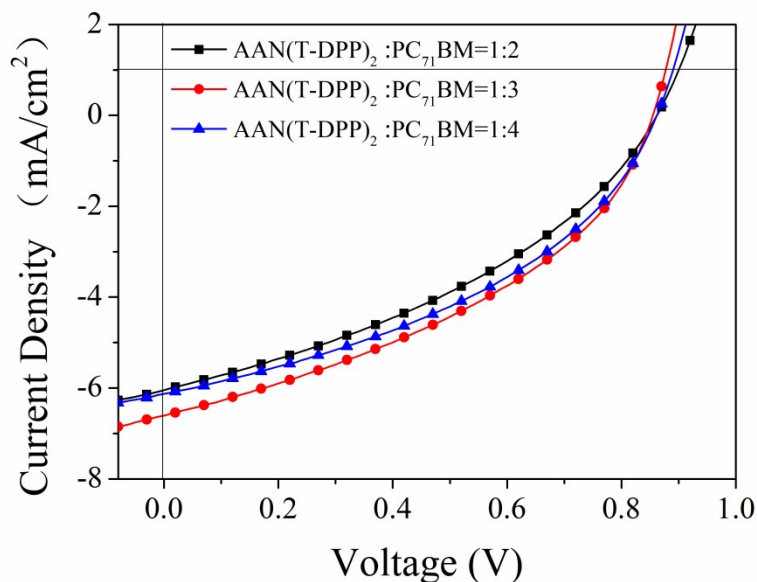

**Fig. S23.**  $J$ - $V$  curve of the AAN(T-DPP)<sub>2</sub>/PC<sub>71</sub>BM-based OSCs under AM.1.5G illumination (100 mW/cm<sup>2</sup>) with SM/PC<sub>71</sub>BM weight ratios optimization.

**Table. S3.** Photovoltaic parameters of the AAN(T-DPP)<sub>2</sub>/PC<sub>71</sub>BM-based OSCs under AM.1.5G illumination (100 mW/cm<sup>2</sup>) with SM/PC<sub>71</sub>BM weight ratios optimization.

| D/A | $V_{oc}$ (V) | $J_{sc}$ (mA/cm <sup>2</sup> ) | FF(%) | PCE(%) |
|-----|--------------|--------------------------------|-------|--------|
| 1:2 | 0.86         | 6.03                           | 37.85 | 1.96   |
| 1:3 | 0.85         | 6.60                           | 40.22 | 2.26   |
| 1:4 | 0.86         | 6.12                           | 40.82 | 2.15   |

Device condition:

(1) chloroform(CF);

(2) concentration: 12 mg/mL of AAN(T-DPP)<sub>2</sub> in CF;

(3) Structure: ITO/PEDOT:PSS (5000 rpm, 140 °C, 30 min)/SM:PC<sub>71</sub>BM (5000

rpm)/Ca (10 nm)/Al (100 nm)  
 (4) Spin-coating temperature: at room temperature.

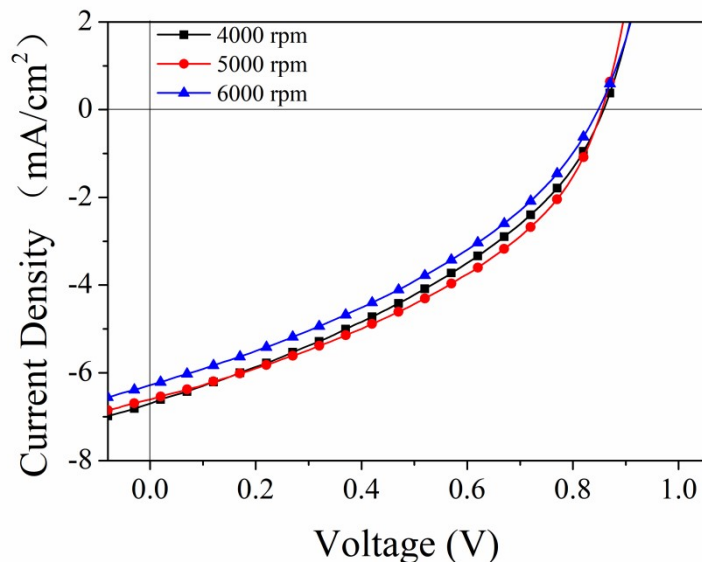

**Fig. S24.**  $J$ - $V$  curve of the AAN(T-DPP)<sub>2</sub>/PC<sub>71</sub>BM-based OSCs under AM.1.5G illumination (100 mW/cm<sup>2</sup>) with SM/PC<sub>71</sub>BM spin speed optimization.

**Table. S4.** Photovoltaic parameters of the AAN(T-DPP)<sub>2</sub>/PC<sub>71</sub>BM-based OSCs under AM.1.5G illumination (100 mW/cm<sup>2</sup>) with SM/PC<sub>71</sub>BM spin speed optimization.

| Spin speed | $V_{oc}$ (V) | $J_{sc}$ (mA/cm <sup>2</sup> ) | FF(%) | PCE(%) |
|------------|--------------|--------------------------------|-------|--------|
| 4000 rpm   | 0.85         | 6.69                           | 37.29 | 2.13   |
| 5000 rpm   | 0.85         | 6.60                           | 40.22 | 2.26   |
| 6000 rpm   | 0.84         | 6.27                           | 37.10 | 1.97   |

Device condition:

- (1) chloroform(CF);
- (2) concentration: 12 mg/mL of AAN(T-DPP)<sub>2</sub> in CF;
- (3) Structure: ITO/PEDOT:PSS (5000 rpm, 140 °C, 30 min)/SM:PC<sub>71</sub>BM= 1:3/Ca (10 nm)/Al (100 nm)

(4) Spin-coating temperature: at room temperature.

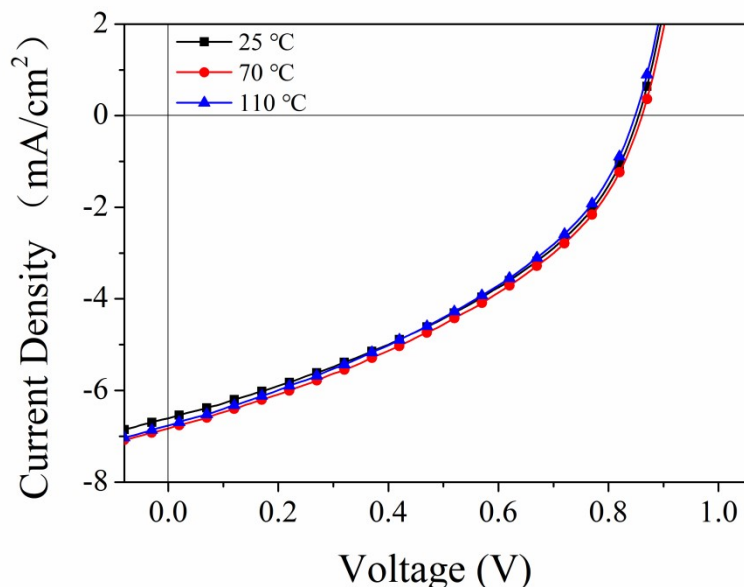

**Fig. S25.**  $J$ - $V$  curve of the AAN(T-DPP)<sub>2</sub>/PC<sub>71</sub>BM-based OSCs under AM.1.5G illumination (100 mW/cm<sup>2</sup>) with annealing temperature optimization.

**Table. S5.** Photovoltaic parameters of the AAN(T-DPP)<sub>2</sub>/PC<sub>71</sub>BM-based OSCs under AM.1.5G illumination (100 mW/cm<sup>2</sup>) with annealing temperature optimization.

| Temperature (°C) | V <sub>oc</sub> (V) | J <sub>sc</sub> (mA/cm <sup>2</sup> ) | FF(%) | PCE(%) |
|------------------|---------------------|---------------------------------------|-------|--------|
| 25               | 0.85                | 6.60                                  | 40.22 | 2.26   |
| 70               | 0.86                | 6.82                                  | 39.80 | 2.33   |
| 110              | 0.85                | 6.76                                  | 39.15 | 2.24   |

Device condition:

(1) chloroform(CF);

(2) concentration: 12 mg/mL of AAN(T-DPP)<sub>2</sub> in CF;

(3) Structure: ITO/PEDOT:PSS (5000 rpm, 140 °C, 30 min)/SM:PC<sub>71</sub>BM= 1:3, 5000 rpm/Ca (10 nm)/Al (100 nm)

## 7. Photovoltaic properties of the AANT(T-DPP)<sub>2</sub>/PC<sub>71</sub>BM-based OPV cells.

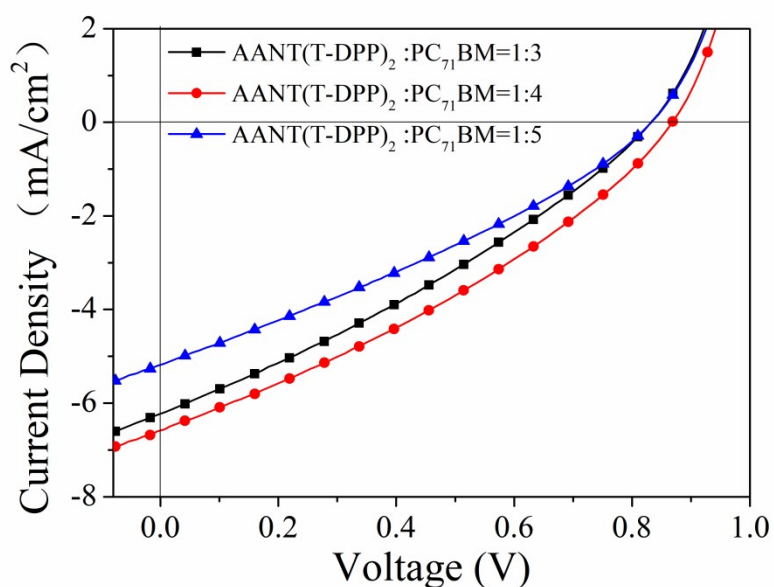

**Fig. S26.** *J-V* curve of the AANT(T-DPP)<sub>2</sub>/PC<sub>71</sub>BM-based OSCs under AM.1.5G illumination (100 mW/cm<sup>2</sup>) with SM/PC<sub>71</sub>BM weight ratios optimization.

**Table. S6.** Photovoltaic parameters of the AANT(T-DPP)<sub>2</sub>/PC<sub>71</sub>BM-based OSCs under AM.1.5G illumination (100 mW/cm<sup>2</sup>) with SM/PC<sub>71</sub>BM weight ratios optimization.

| D/A | V <sub>oc</sub> (V) | J <sub>sc</sub> (mA/cm <sup>2</sup> ) | FF(%) | PCE(%) |
|-----|---------------------|---------------------------------------|-------|--------|
| 1:3 | 0.83                | 6.22                                  | 30.82 | 1.58   |
| 1:4 | 0.86                | 6.58                                  | 32.61 | 1.85   |
| 1:5 | 0.83                | 5.18                                  | 30.72 | 1.32   |

Device condition:

- (1) chloroform(CF);
- (2) concentration: 12 mg/mL of AANT(T-DPP)<sub>2</sub> in CF;
- (3) Structure: ITO/PEDOT:PSS (5000 rpm, 140 °C, 30 min)/SM:PC<sub>71</sub>BM (3000

rpm)/Ca (10 nm)/Al (100 nm)

(4) Spin-coating temperature: at room temperature.

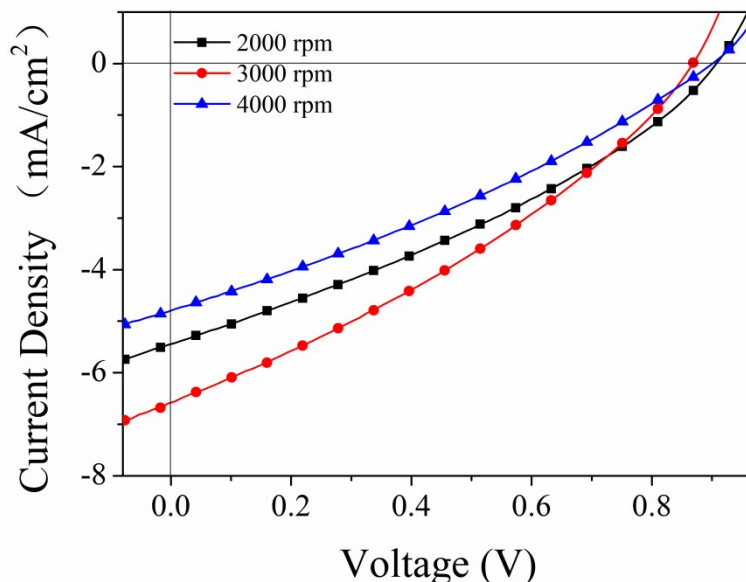

**Fig. S27.**  $J$ - $V$  curve of the AANT(T-DPP)<sub>2</sub>/PC<sub>71</sub>BM-based OSCs under AM.1.5G illumination (100 mW/cm<sup>2</sup>) with SM/PC<sub>71</sub>BM spin speed optimization.

**Table. S7.** Photovoltaic parameters of the AANT(T-DPP)<sub>2</sub>/PC<sub>71</sub>BM-based OSCs under AM.1.5G illumination (100 mW/cm<sup>2</sup>) with SM/PC<sub>71</sub>BM spin speed optimization.

| Spin speed | $V_{oc}$ (V) | $J_{sc}$ (mA/cm <sup>2</sup> ) | FF(%) | PCE(%) |
|------------|--------------|--------------------------------|-------|--------|
| 2000 rpm   | 0.91         | 5.44                           | 32.48 | 1.61   |
| 3000 rpm   | 0.86         | 6.58                           | 32.61 | 1.85   |
| 4000 rpm   | 0.89         | 4.79                           | 30.80 | 1.32   |

Device condition:

(1) chloroform(CF);

(2) concentration: 12 mg/mL of AANT(T-DPP)<sub>2</sub> in CF;

(3) Structure: ITO/PEDOT:PSS (5000 rpm, 140 °C, 30 min)/SM:PC<sub>71</sub>BM= 1:4/Ca (10 nm)/Al (100 nm)

(4) Spin-coating temperature: at room temperature.

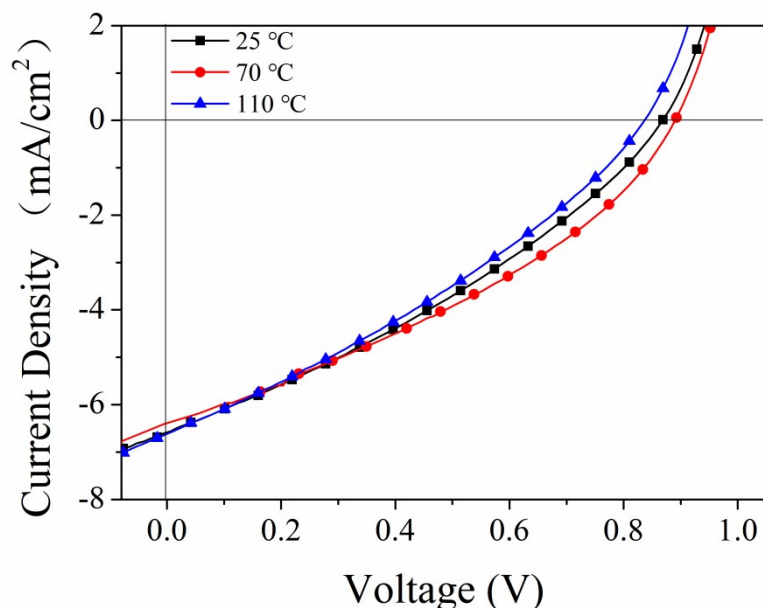

**Fig. S28.**  $J$ - $V$  curve of the AANT(T-DPP)<sub>2</sub>/PC<sub>71</sub>BM-based OSCs under AM.1.5G illumination (100 mW/cm<sup>2</sup>) with annealing temperature optimization.

**Table. S8.** Photovoltaic parameters of the AANT(T-DPP)<sub>2</sub>/PC<sub>71</sub>BM-based OSCs under AM.1.5G illumination (100 mW/cm<sup>2</sup>) with annealing temperature optimization.

| Temperature<br>(°C) | V <sub>oc</sub> (V) | J <sub>sc</sub> (mA/cm <sup>2</sup> ) | FF(%) | PCE(%) |
|---------------------|---------------------|---------------------------------------|-------|--------|
| 25                  | 0.86                | 6.58                                  | 32.61 | 1.85   |
| 70                  | 0.90                | 6.25                                  | 36.12 | 2.03   |
| 110                 | 0.83                | 6.61                                  | 31.87 | 1.75   |

Device condition:

- (1) chloroform(CF);
- (2) concentration: 10 mg/mL of AANT(T-DPP)<sub>2</sub> in CF;
- (3) Structure: ITO/PEDOT:PSS (5000 rpm, 140 °C, 30 min)/SM:PC<sub>71</sub>BM= 1:4,  
3000 rpm/Ca (10 nm)/Al (100 nm)

## 8. The PCE distribution of all devices at the optimized conditions.

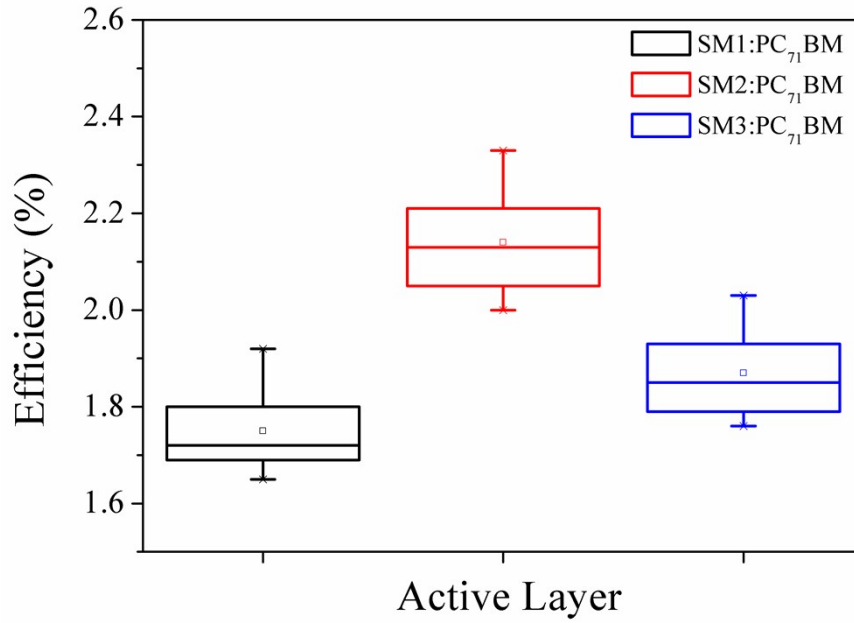

**Fig. S29.** Efficiency ranges of SM1:PC<sub>71</sub>BM, SM2:PC<sub>71</sub>BM and SM3:PC<sub>71</sub>BM, respectively. For 10 devices showing minimum, maximum and average efficiency values.
